# Supplementary material
Source: PubMed Central journal article supplement (PMC4044721)

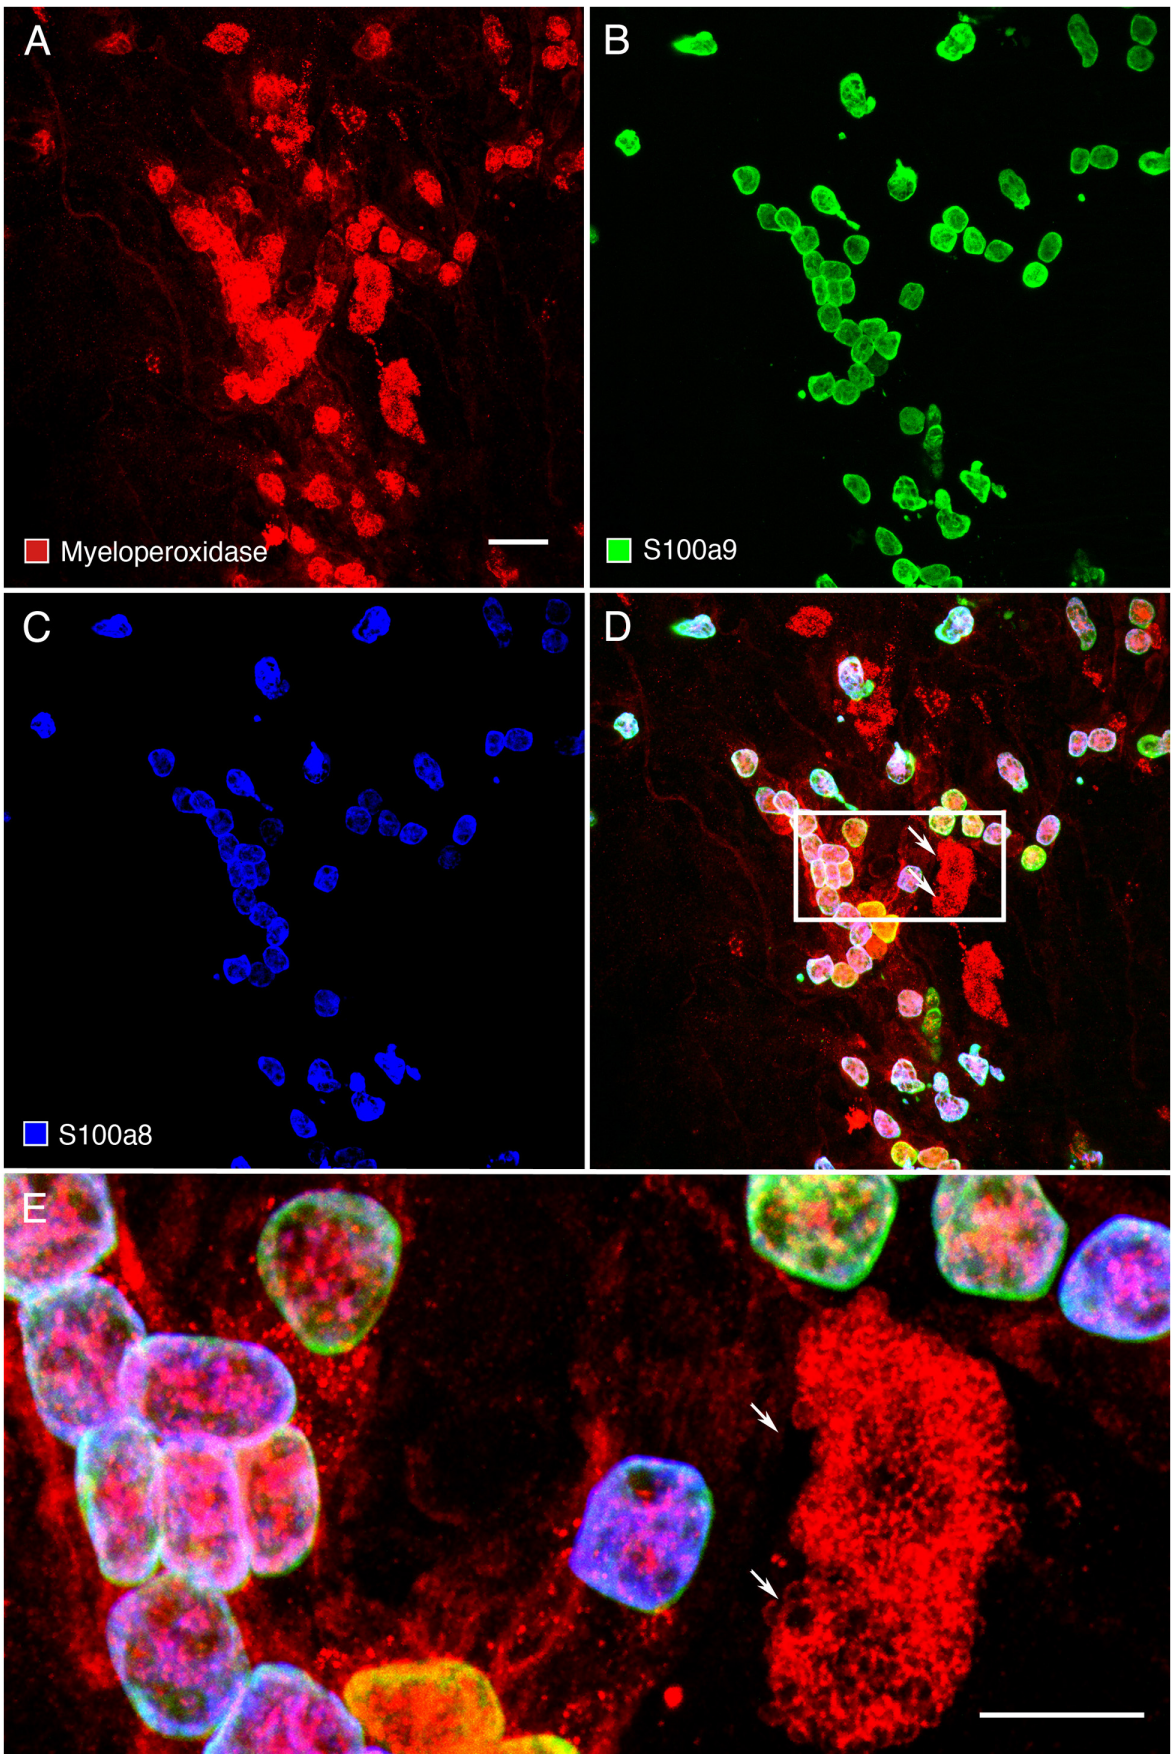

Supplemental Figure 1

Supplement: mmc1.pdf [file mmc1.pdf]

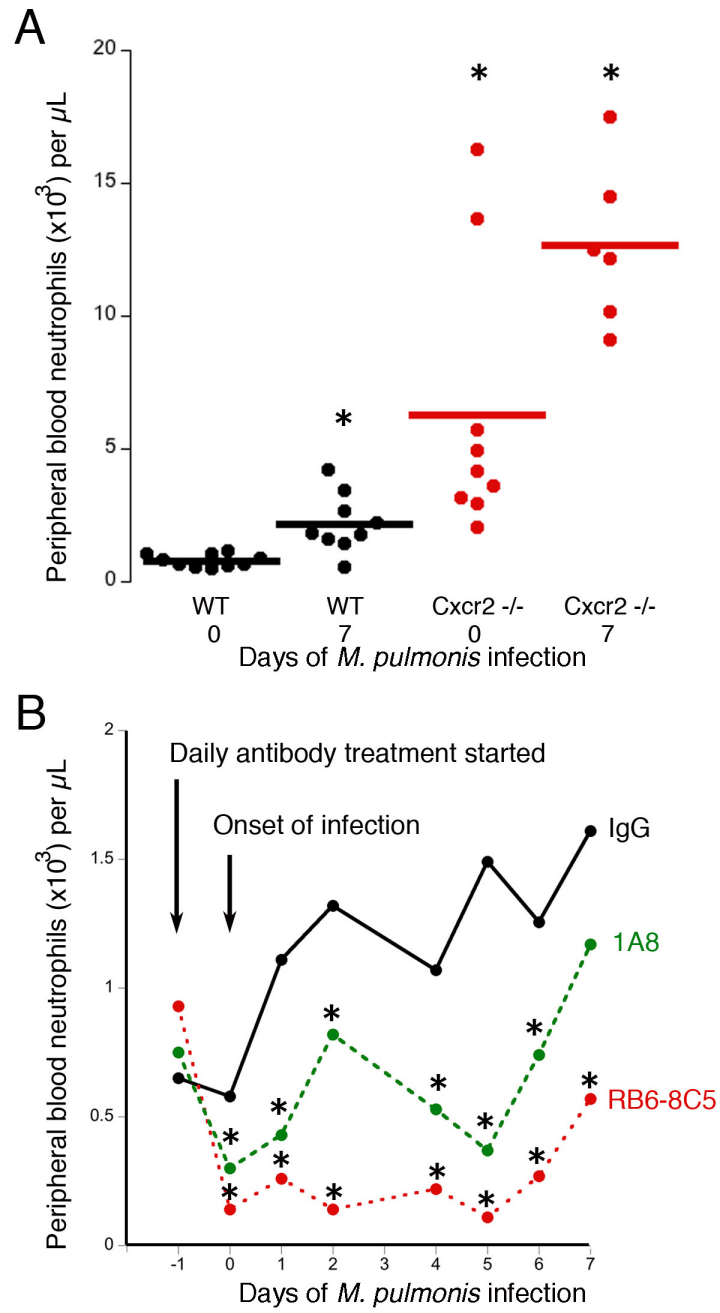

Supplemental Figure 2

Supplement: mmc2.pdf [file mmc2.pdf]
